# Supplementary material for: SOX9 predicts progression toward cirrhosis in patients while its loss protects against liver fibrosis
Source: PubMed Central journal article supplement (PMC5709769; doi:10.15252/emmm.201707860), 2017-11-06

## Expanded View Figures

Figure EV1. Patient flowchart for biopsy selection.

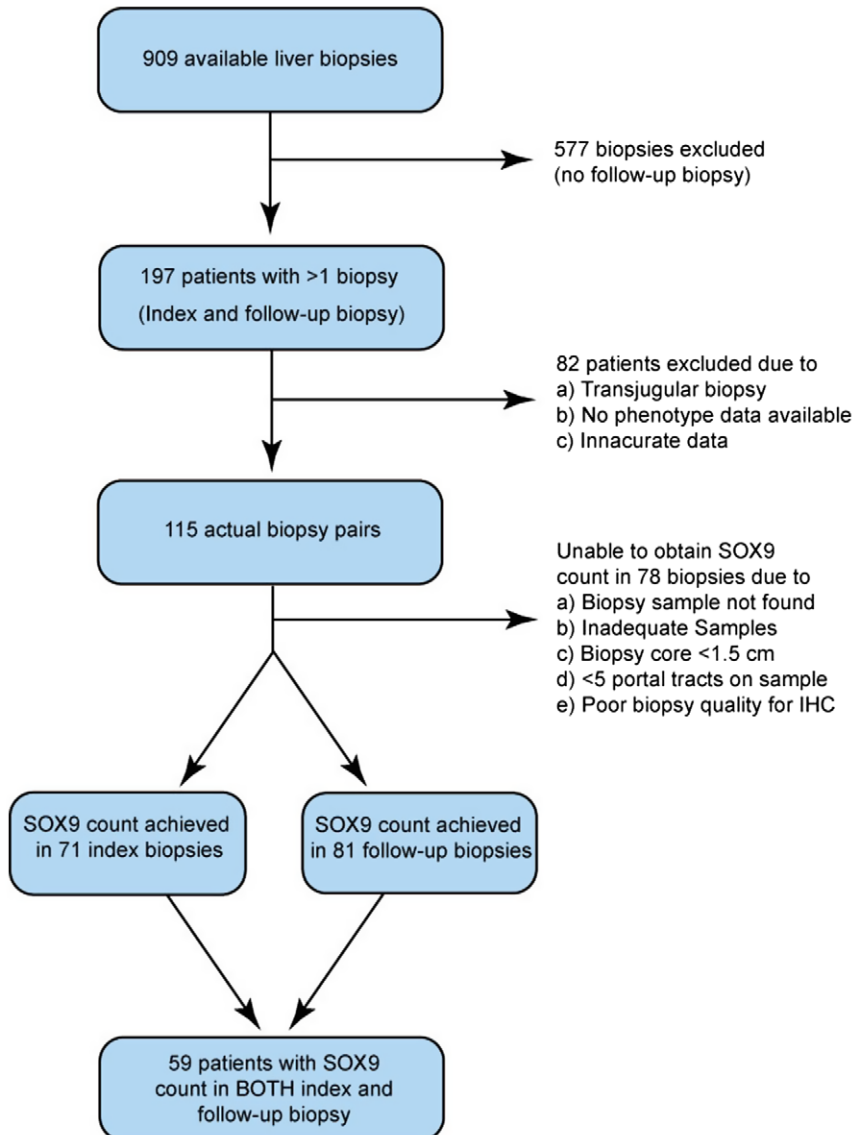

Supplement: EMMM-9-1696-s002.pdf [file EMMM-9-1696-s002.pdf]
