# Supplementary material for: SOX9 predicts progression toward cirrhosis in patients while its loss protects against liver fibrosis
Source: PubMed Central journal article supplement (PMC5709769; doi:10.15252/emmm.201707860), 2017-11-06
Supplement: EMMM-9-1696-s004.pdf [file EMMM-9-1696-s004.pdf]

Figure 2 panel D

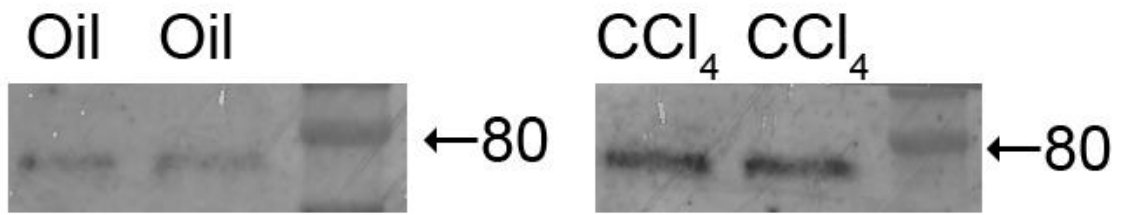

JP611 Sox9

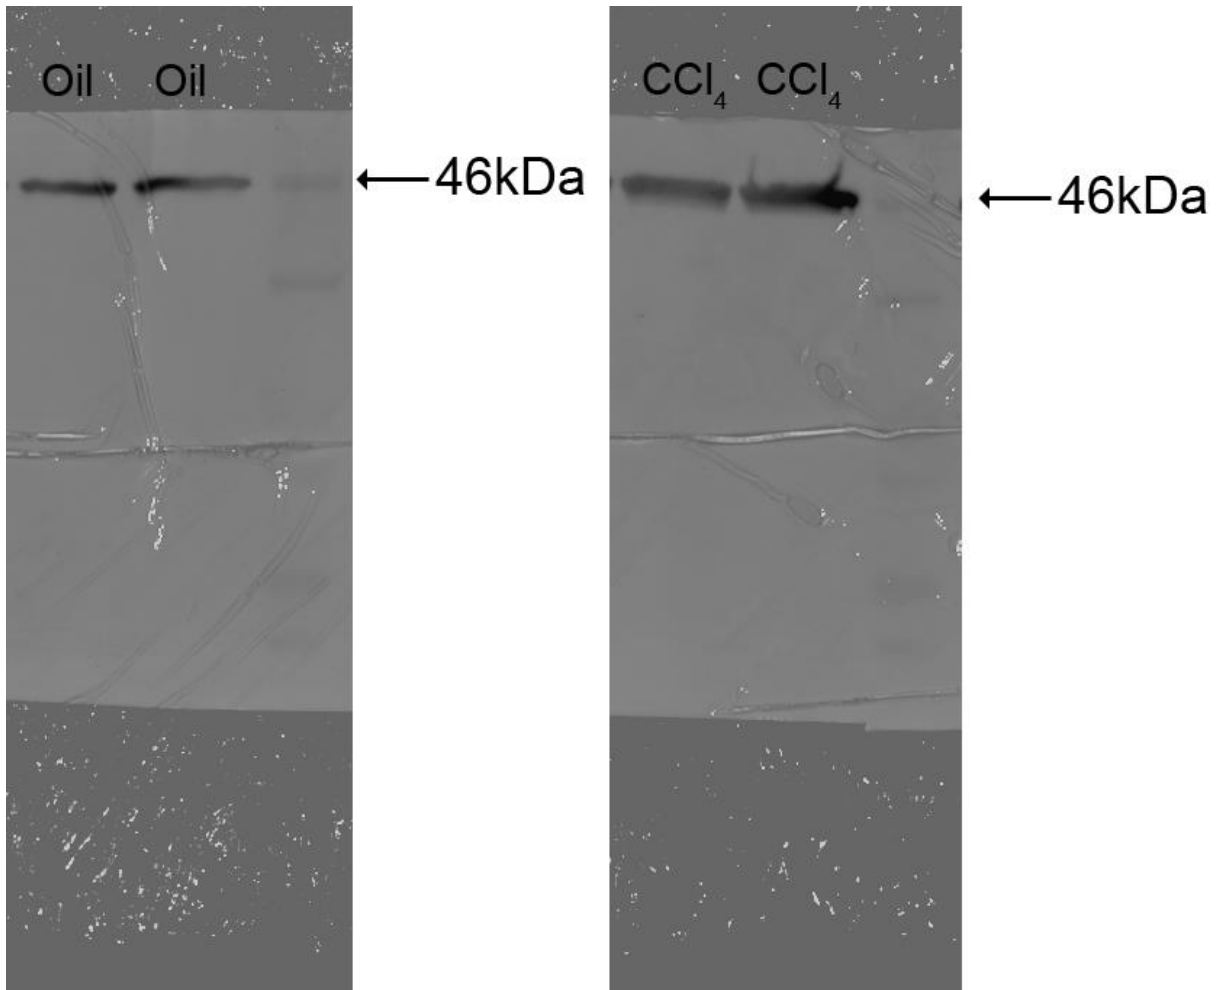

JP611  $\beta$ -actin
