# Supplementary material for: SOX9 predicts progression toward cirrhosis in patients while its loss protects against liver fibrosis
Source: PubMed Central journal article supplement (PMC5709769; doi:10.15252/emmm.201707860), 2017-11-06
Supplement: EMMM-9-1696-s005.pdf [file EMMM-9-1696-s005.pdf]

Figure 4 panel F

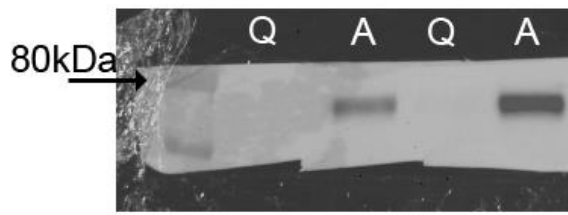

JL110 AlbCre HSCs: Sox9

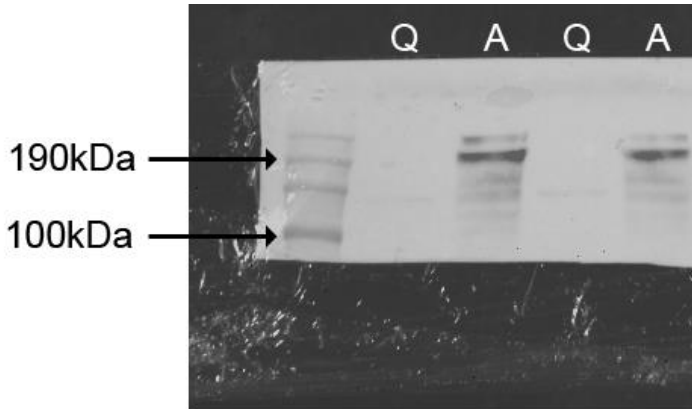

JL109 AlbCre HSCs: Col1

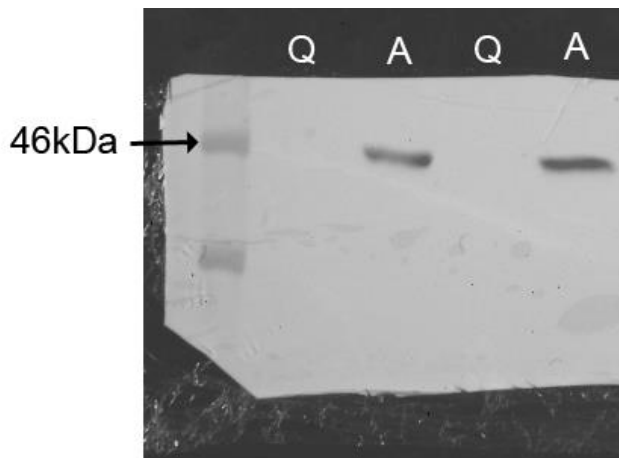

JL108 AlbCre HSCs:  $\alpha$ -sma

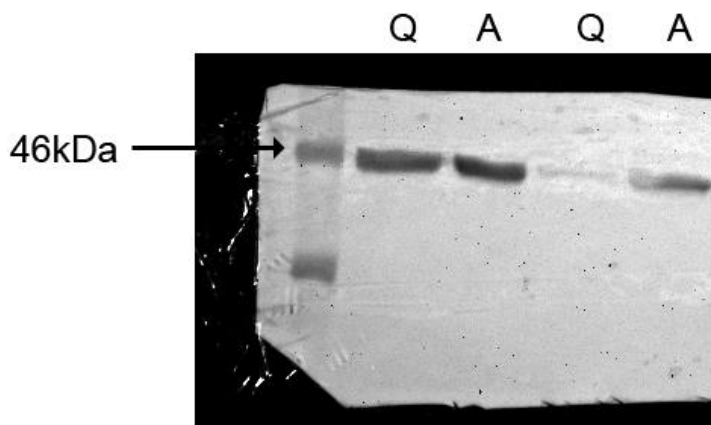

JL108 AlbCre HSCs:  $\beta$ -actin
